# Supplementary material
Source: MDPI journal article supplement (https://www.mdpi.com/2073-4395/12/11/2763)
Supplement: s1 [file s1 › agronomy-1988558-supplementary.pdf]

## Supplementary file

Article

### Effect of Sun Drying on Phytoconstituents and Antiviral Activity of Ginger Against Low-Pathogenic Human Coronavirus

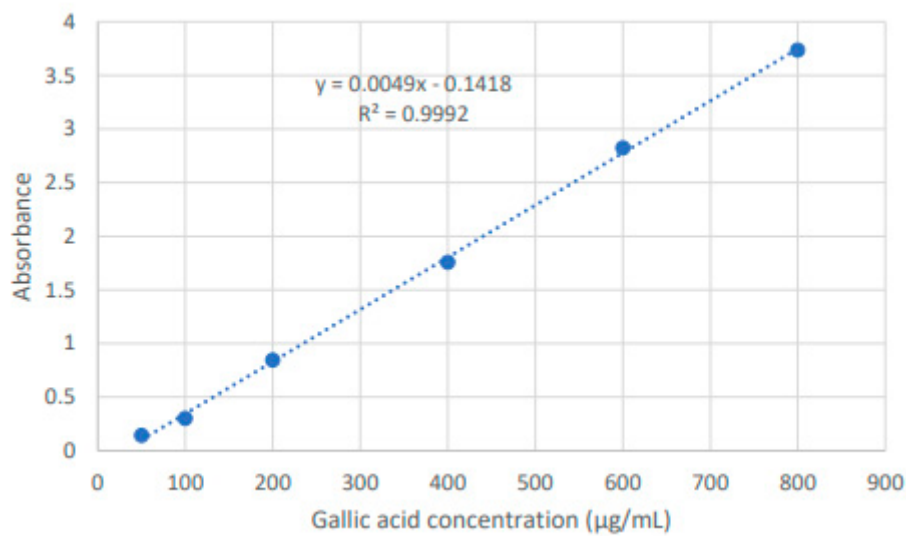

**Figure S1.** Standard calibration curve of gallic acid

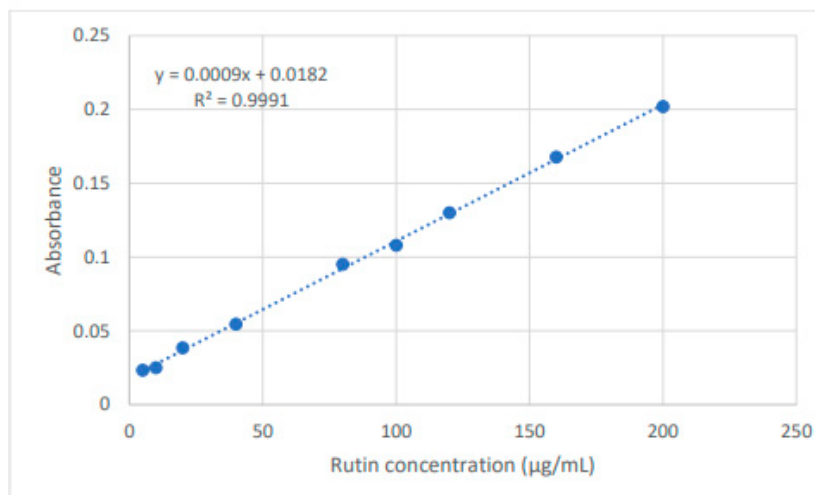

**Figure S2.** Standard calibration curve of rutin

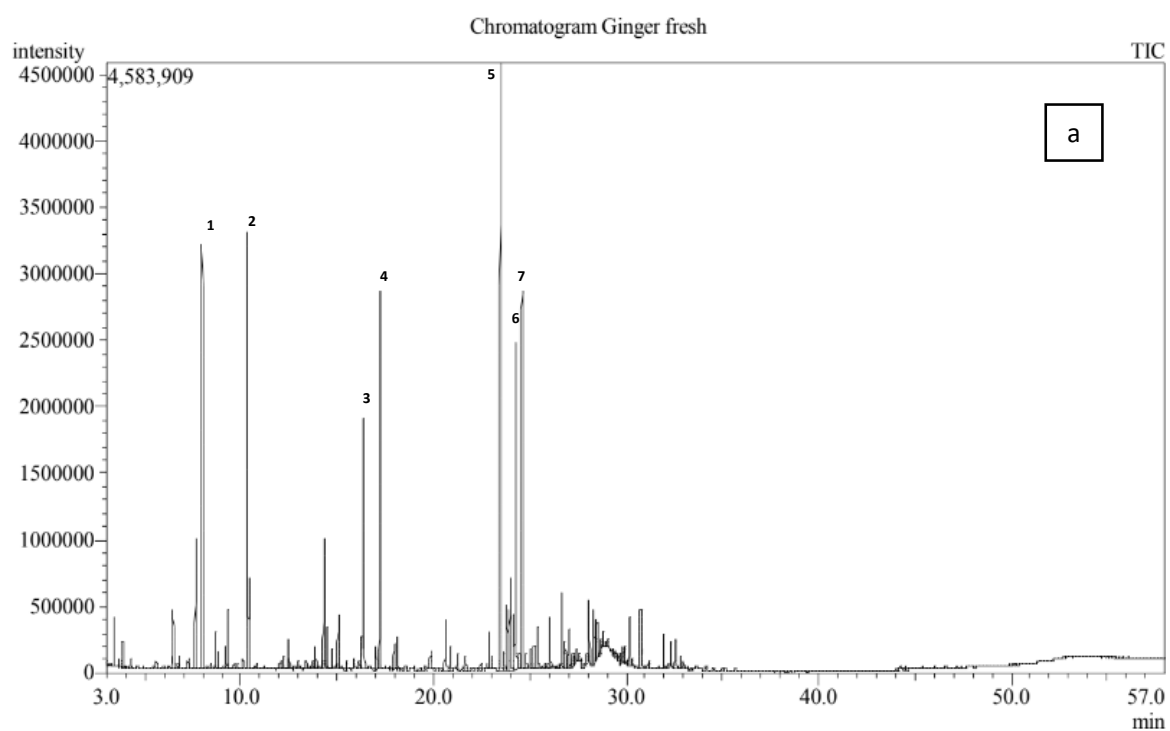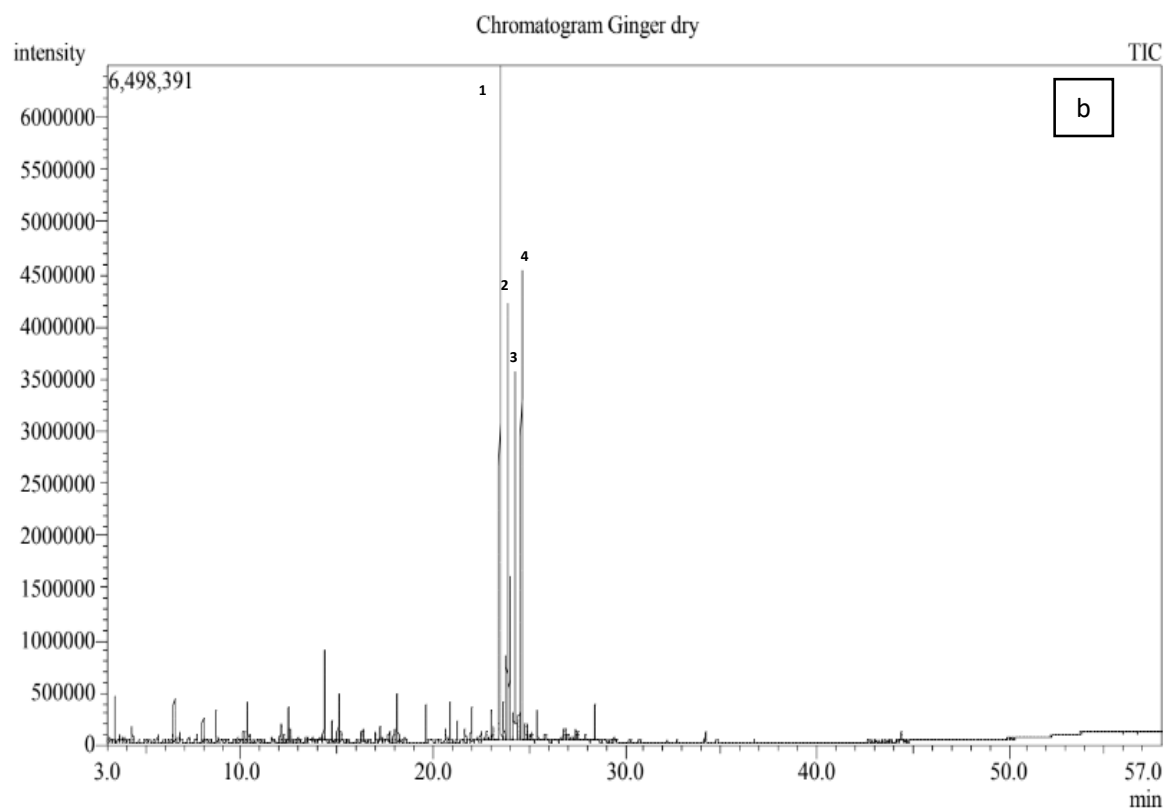

**Figure S3.** GC/ MS chromatogram for fresh ginger volatile oil (a); 1 camphene, 2 4-Thujanol, 3 Borneol, 4  $\beta$ -Citral, 5  $\alpha$ -Curcumene, 6 Zingiberene and 7  $\beta$ -Bisabolene. Dry ginger volatile oil (b); 1  $\alpha$ -Curcumene, 2 Zingiberene, 3  $\beta$ -Bisabolene and 4  $\beta$ -Sesquiphellandrene

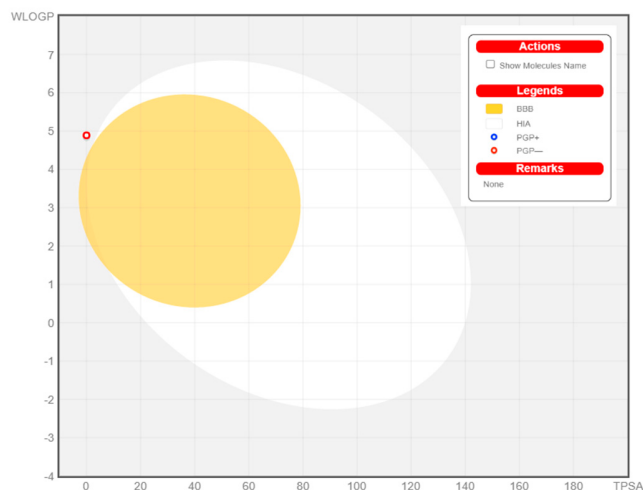

**Figure S4.** BOILED Egg predictive model for one of the most active components (1N9). All the active components displayed similar properties.

**Table S1.** Selectivity index of fresh and dry Ginger extracts

| Sample               | IC <sub>50</sub> | Selective index $\mu\text{g/ mL}$ |
|----------------------|------------------|-----------------------------------|
| Fresh ginger extract | 28.5 $\pm$ 0.8   | 16.40                             |
| Dry ginger extract   | 20.56 $\pm$ 0.4  | 18.55                             |

**Table S2:** Results of calibration and predictive ability of the PLS-R model.

| Antiviral activity |             |             |
|--------------------|-------------|-------------|
|                    | Y Reference | Y Predicted |
| DG1                | 20.75       | 20.51       |
| DG2                | 20.56       | 20.52       |
| DG3                | 20.26       | 20.52       |
| FG1                | 29.00       | 28.46       |
| FG2                | 28.50       | 28.47       |
| FG3                | 27.90       | 28.46       |
